# Supplementary material for: Effects of surface treatments on trapping with DC insulator-based dielectrophoresis
Source: Royal Society of Chemistry journal article supplement (doi:10.1039/c9an01186b), 2019-01-01

## Effects of Surface Treatments on Trapping with DC Insulator-based Dielectrophoresis

Claire V. Crowther<sup>1</sup>, Viola Sanderlin<sup>2</sup>, Mark A. Hayes<sup>1</sup>, & Gillian H. Gile<sup>2</sup>

<sup>1</sup>School of Molecular Sciences, Arizona State University, Tempe, Arizona, USA

<sup>2</sup>School of Life Sciences, Arizona State University, Tempe, Arizona, USA

### Table of Contents

|                                                                                                                       |           |
|-----------------------------------------------------------------------------------------------------------------------|-----------|
| Demonstration of Dielectrophoretic Trapping of <i>E. coli</i> .....                                                   | S-2       |
| <i>E. coli</i> surface modification.....                                                                              | S-2       |
| Preliminary Analysis of the Effect of Surface Modifications of the Dielectrophoretic Trapping of <i>E. coli</i> ..... | S-3 – S-4 |

### Demonstration of Dielectrophoretic Trapping of *E. coli*

*E. coli* with a bovine serum albumin (BSA) surface modification in a microdevice with a global applied potential of -500V.

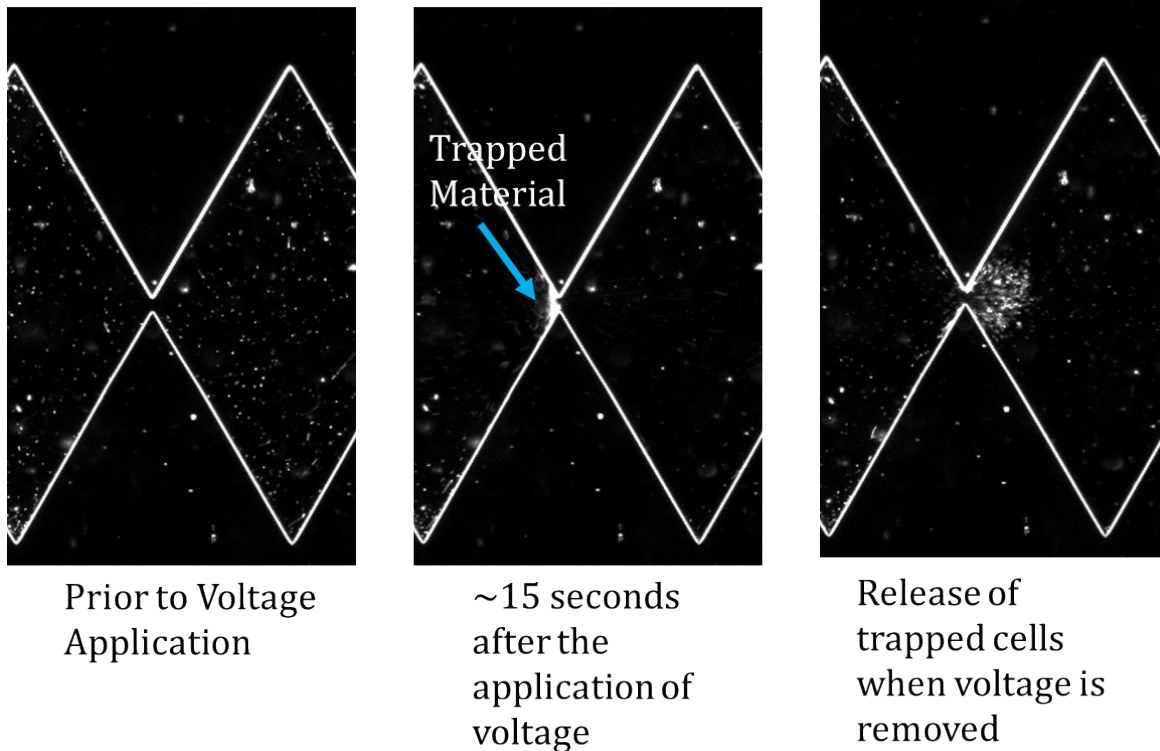

### *E. coli* surface modification

Visual demonstration of *E. coli* with no surface modification (right) versus cells labelled with 7-amino-4-methyl-3-coumarinylacetic acid (AMCA) (left) which only fluoresces when a covalent bond is formed. This first image is right after labelling and the second image is the pellet of cells after washing.

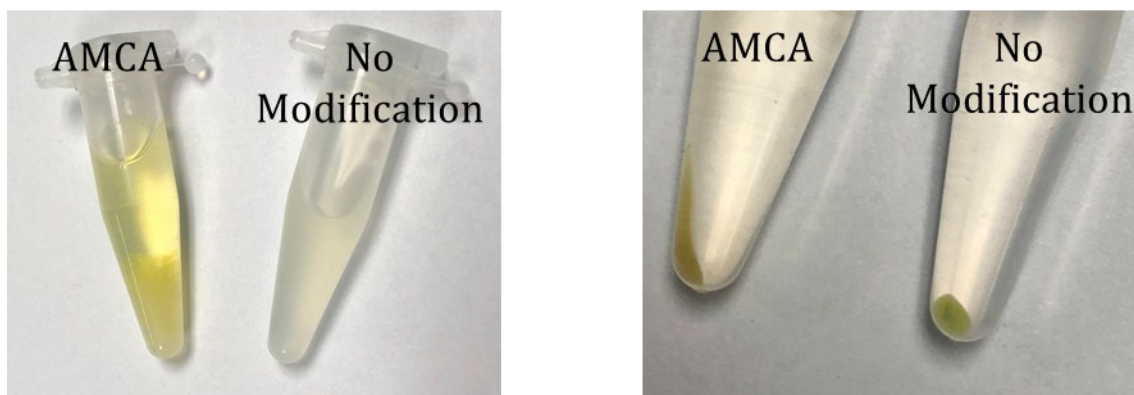

## Preliminary Analysis of the Effect of Surface Modifications of the Dielectrophoretic Trapping of *E. coli*

Variations in the dielectrophoretic trapping of the various surface modifications are demonstrated based on the applied voltage where trapping of the bacteria is first detected. This can be seen by an increase in the fluorescence intensity. The collection of the bacteria has a linear phase based on the velocity of the bacteria in the microchannel. Both the initial voltage for trapping and the slope of the line for collection are representative of the biophysical properties of the cells.

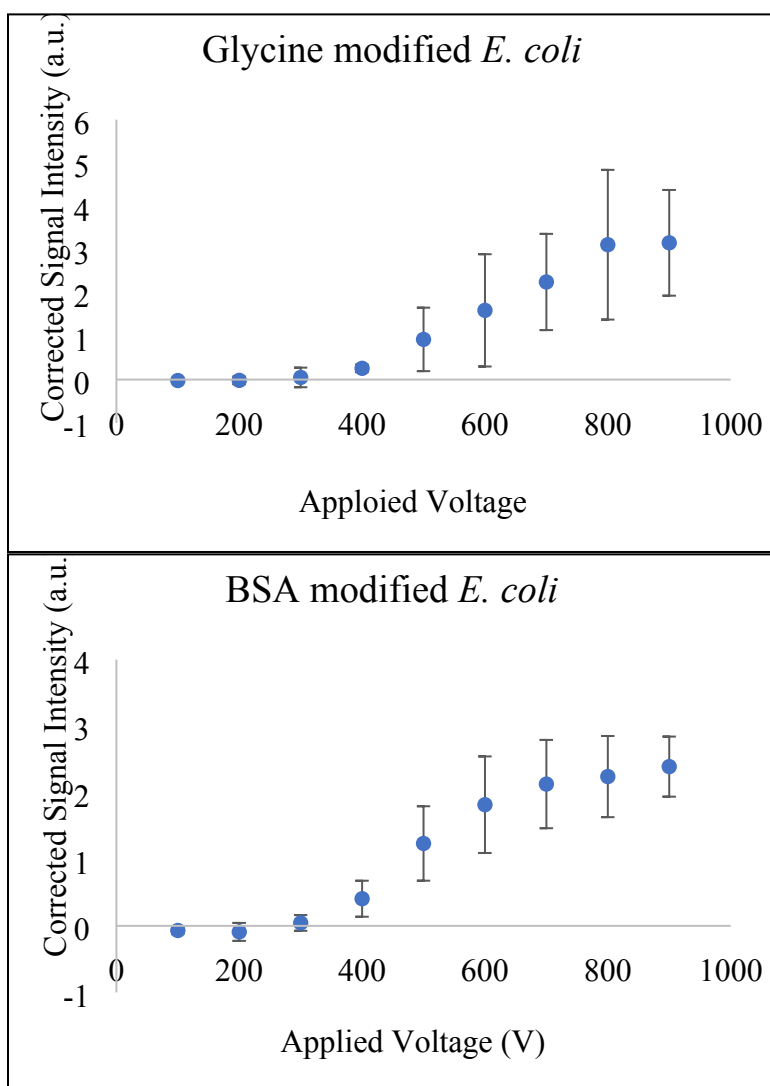

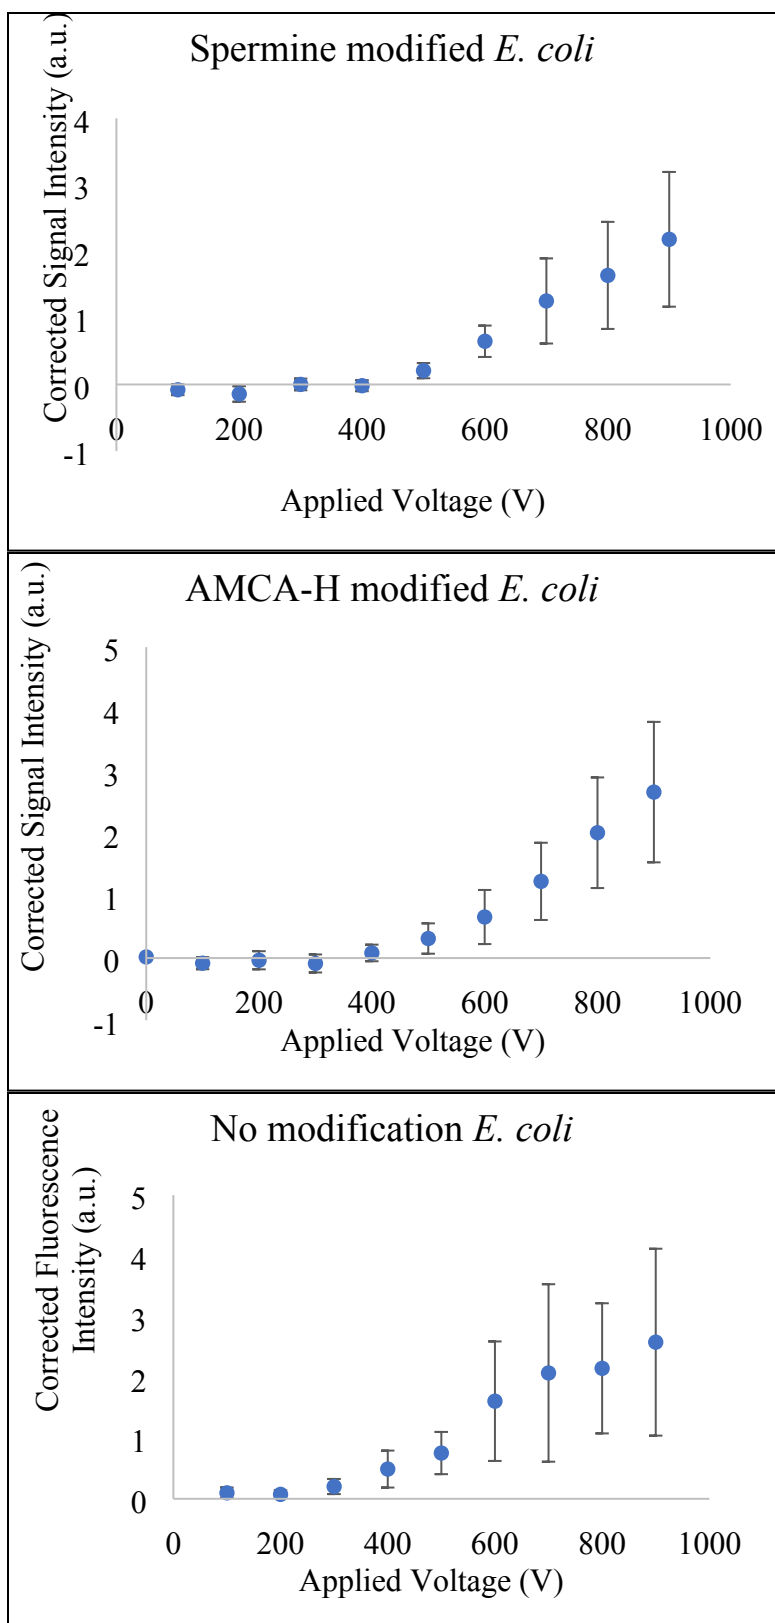

Supplement: c9an01186b1.pdf [file c9an01186b1.pdf]
